# Supplementary material for: Increased Risk of Osteoporosis in Gastric Cancer Survivors Compared to General Population Control: A Study with Representative Korean Population
Source: PubMed Central journal article supplement — Cancer Res Treat. 2018 Jun 27;51(2):530–7. doi: 10.4143/crt.2018.164 (PMC6473291; doi:10.4143/crt.2018.164), 2018-06-27
Supplement: crt-2018-164-suppl1.pdf [file crt-2018-164-suppl1.pdf]

**S1 Table.** Multinomial logistic regression for osteoporosis according to period of gastric cancer diagnosis

|                                   | No.<br>(W %) | Unadjusted       |         | Model 1                            |         | Model 2                            |         |
|-----------------------------------|--------------|------------------|---------|------------------------------------|---------|------------------------------------|---------|
|                                   |              | RR (95% CI)      | p-value | Adjusted RR <sup>a)</sup> (95% CI) | p-value | Adjusted RR <sup>a)</sup> (95% CI) | p-value |
| <b>Cancer diagnosis ≤ 5 yr</b>    | 42           |                  |         |                                    |         |                                    |         |
| Normal                            | 9 (19.3)     | 1.00             |         | 1.00                               |         | 1.00                               |         |
| Osteopenia                        | 21 (51.2)    | 1.75 (0.64-4.77) | 0.272   | 1.37 (0.42-4.45)                   | 0.596   | 1.16 (0.31-4.39)                   | 0.828   |
| Osteoporosis                      | 12 (29.5)    | 2.52 (0.83-7.64) | 0.102   | 1.78 (0.42-7.46)                   | 0.430   | 2.16 (0.47-9.93)                   | 0.471   |
| <b>Cancer diagnosis &gt; 5 yr</b> | 52           |                  |         |                                    |         |                                    |         |
| Normal                            | 6 (10.9)     | 1.00             |         | 1.00                               |         | 1.00                               |         |
| Osteopenia                        | 27 (58.3)    | 4.42 (1.52-12.9) | 0.007   | 5.48 (1.82-16.5)                   | 0.003   | 5.89 (1.81-19.2)                   | 0.003   |
| Osteoporosis                      | 19 (30.8)    | 5.14 (1.64-16.1) | 0.005   | 5.75 (1.46-22.6)                   | 0.012   | 7.17 (1.62-31.8)                   | 0.010   |

W %, weighted percent; CI, confidence interval; RR, relative risk. <sup>a)</sup>Model 1 was adjusted for age, sex, body mass index, smoking status, alcohol consumption, and physical activity and Model 2 was adjusted for covariates in model 1 plus hypertension, diabetes, household income and health check-up status in 559 subjects.
