# Supplementary material for: Increased Risk of Osteoporosis in Gastric Cancer Survivors Compared to General Population Control: A Study with Representative Korean Population
Source: PubMed Central journal article supplement — Cancer Res Treat. 2018 Jun 27;51(2):530–7. doi: 10.4143/crt.2018.164 (PMC6473291; doi:10.4143/crt.2018.164), 2018-06-27
Supplement: crt-2018-164-suppl2.pdf [file crt-2018-164-suppl2.pdf]

**S2 Table.** Multivariable logistic regression for nutritional status and bone-related biomarker according to osteoporosis

|                                | Low calcium intake <sup>a)</sup> |         | Vitamin D deficiency <sup>b)</sup> |         | Elevated ALP <sup>c)</sup> |         | Elevated PTH <sup>d)</sup> |         |
|--------------------------------|----------------------------------|---------|------------------------------------|---------|----------------------------|---------|----------------------------|---------|
|                                | aOR (95% CI)                     | p-value | aOR (95% CI)                       | p-value | aOR (95% CI)               | p-value | aOR (95% CI)               | p-value |
| <b>Total</b>                   |                                  |         |                                    |         |                            |         |                            |         |
| Normal                         | 1.00                             |         | 1.00                               |         | 1.00                       |         | 1.00                       |         |
| Osteopenia                     | 1.35 (0.64-2.86)                 | 0.436   | 0.85 (0.49-1.48)                   | 0.561   | 2.41 (1.32-4.41)           | 0.004   | 1.42 (0.83-2.43)           | 0.204   |
| Osteoporosis                   | 1.53 (0.46-5.07)                 | 0.483   | 1.48 (0.71-2.09)                   | 0.299   | 4.44 (1.99-9.91)           | < 0.001 | 2.49 (1.15-5.40)           | 0.021   |
| <b>No gastric cancer</b>       |                                  |         |                                    |         |                            |         |                            |         |
| Normal                         | 1.00                             |         | 1.00                               |         | 1.00                       |         | 1.00                       |         |
| Osteopenia                     | 1.63 (0.71-3.70)                 | 0.246   | 0.70 (0.38-1.27)                   | 0.236   | 2.00 (1.06-3.77)           | 0.032   | 1.30 (0.73-2.31)           | 0.377   |
| Osteoporosis                   | 1.77 (0.47-6.70)                 | 0.400   | 1.28 (0.57-2.88)                   | 0.545   | 2.89 (1.22-6.82)           | 0.016   | 2.50 (1.06-5.91)           | 0.037   |
| <b>Gastric cancer survivor</b> |                                  |         |                                    |         |                            |         |                            |         |
| Normal                         | 1.00                             |         | 1.00                               |         | 1.00                       |         | 1.00                       |         |
| Osteopenia                     | 0.71 (0.05-10.8)                 | 0.803   | 2.60 (0.28-23.8)                   | 0.236   | 22.3 (1.92-259.8)          | 0.014   | 2.31 (0.24-22.1)           | 0.463   |
| Osteoporosis                   | 0.64 (0.01-45.1)                 | 0.837   | 4.98 (0.44-56.1)                   | 0.190   | 358.9 (6.68-19290.0)       | 0.004   | 2.66 (0.28-77.3)           | 0.279   |

Adjusted for age, sex, body mass index, smoking status, alcohol consumption, physical activity, hypertension, diabetes, household income and health check-up status. aOR, adjusted odd ratio; CI, confidence interval; ALP, alkaline phosphatase; PTH, parathyroid hormone. <sup>a)</sup>Low calcium intake is defined as those who take < 800mg/day, <sup>b)</sup>Vitamin D deficiency is defined as those who have serum levels of 25-hydroxy-vitamin D < 20 ng/mL, <sup>c)</sup>Elevated ALP means ALP ≥ 250 IU/L, <sup>d)</sup>Elevated PTH means PTH ≥ 65 pg/mL.
